# Supplementary material for: TOFHunter—unlocking rapid untargeted screening of inductively coupled plasma–time-of-flight–mass spectrometry data
Source: Royal Society of Chemistry journal article supplement (doi:10.1039/d4ja00331d), 2025-01-01
Supplement: d4ja00331d1.pdf [file d4ja00331d1.pdf]

## Supporting Information

### TOFHunter—Unlocking Rapid Untargeted Screening of Inductively Coupled Plasma–Time-of-Flight–Mass Spectrometry Data

Hunter B. Andrews,<sup>1\*</sup> Lyndsey Hendriks,<sup>2</sup> Sawyer B. Irvine,<sup>3</sup> Daniel R. Dunlap,<sup>4</sup> Benjamin T. Manard<sup>4</sup>

<sup>1</sup>Radioisotope Science and Technology Division, Oak Ridge National Laboratory, USA

<sup>2</sup>TOFWERK AG, Switzerland

<sup>3</sup>Nuclear Nonproliferation Division, Oak Ridge National Laboratory, USA

<sup>4</sup>Chemical Science Division, Oak Ridge National Laboratory, USA

\*Corresponding author: (H.B.A.) [andrewshb@ornl.gov](mailto:andrewshb@ornl.gov)

Figures: 1

Tables: 1

The TOFHunter script is available as a digital download at:<https://github.com/andrewshb/TOFHunter>.

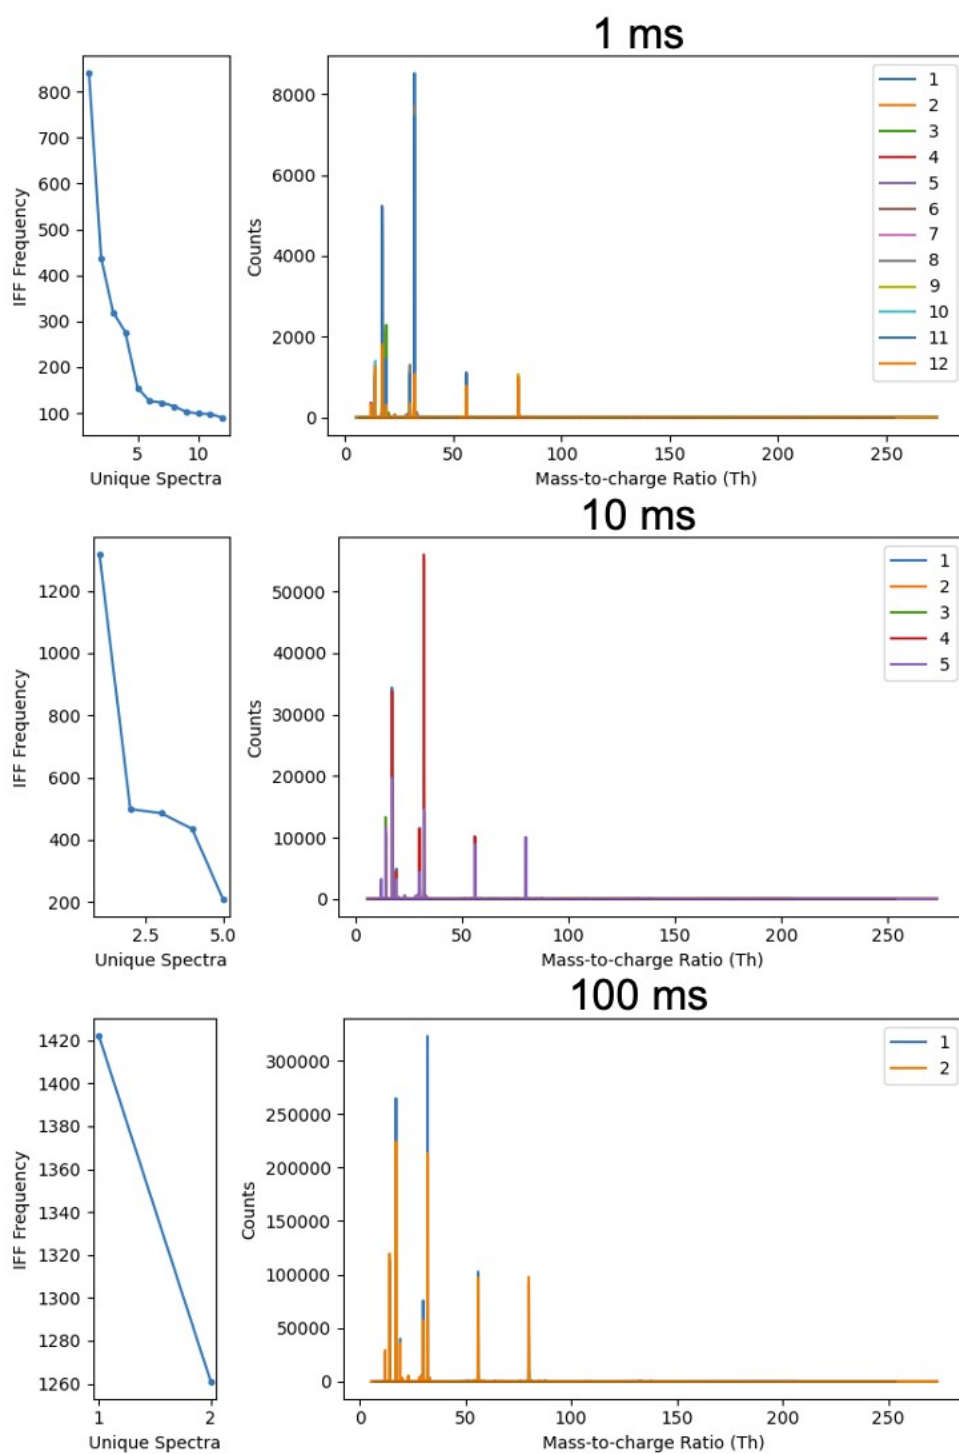

**Figure S1.** Change in IFF-detected unique features as a function of integration time when measuring a multielement standard.

**Table S1.** Abbreviated Peak Summary from Nanoplastic Example.<sup>a</sup>

| # | m/z   | Intensity (a.u.) | Nuclide Matches                                         | Potential Interferences                                                                                                                                                                                                                 |
|---|-------|------------------|---------------------------------------------------------|-----------------------------------------------------------------------------------------------------------------------------------------------------------------------------------------------------------------------------------------|
| 1 | 19.0  | 364              | <sup>19</sup> F                                         | H <sub>3</sub> O <sup>+</sup>                                                                                                                                                                                                           |
| 1 | 21.0  | 60               | <sup>21</sup> Ne                                        |                                                                                                                                                                                                                                         |
| 1 | 23.0  | 453              | <sup>23</sup> Na                                        | <sup>46</sup> Ca <sup>++</sup> , <sup>7</sup> Li <sup>16</sup> O, <sup>6</sup> Li <sup>16</sup> O <sup>1</sup> H, <sup>6</sup> Li <sup>17</sup> O, <sup>46</sup> Ti <sup>++</sup>                                                       |
| 1 | 24.0  | 146              | <sup>24</sup> Mg                                        | <sup>12</sup> C <sup>12</sup> C, <sup>48</sup> Ca <sup>++</sup> , <sup>7</sup> Li <sup>16</sup> O <sup>1</sup> H, <sup>7</sup> Li <sup>17</sup> O, <sup>10</sup> B <sup>14</sup> N, <sup>6</sup> Li <sup>18</sup> O, ...                |
| 1 | 29.0  | 777              | <sup>29</sup> Si                                        | <sup>58</sup> Fe <sup>++</sup> , <sup>11</sup> B <sup>18</sup> O, <sup>11</sup> B <sup>17</sup> O <sup>1</sup> H, <sup>10</sup> B <sup>18</sup> O <sup>1</sup> H, <sup>13</sup> C <sup>16</sup> O, <sup>12</sup> C <sup>17</sup> O, ... |
| 1 | 30.0  | 173              | <sup>30</sup> Si                                        | <sup>11</sup> B <sup>18</sup> O <sup>1</sup> H, <sup>12</sup> C <sup>18</sup> O, <sup>13</sup> C <sup>17</sup> O, <sup>13</sup> C <sup>16</sup> O <sup>1</sup> H, <sup>12</sup> C <sup>16</sup> O <sup>1</sup> H <sup>1</sup> H, ...    |
| 1 | 32.0  | 85               | <sup>32</sup> S                                         | <sup>16</sup> O <sup>16</sup> O, <sup>14</sup> N <sup>17</sup> O <sup>1</sup> H, <sup>15</sup> N <sup>17</sup> O, <sup>14</sup> N <sup>18</sup> O                                                                                       |
| 1 | 41.0  | 53               | <sup>41</sup> K                                         | <sup>40</sup> Ar <sup>1</sup> H, <sup>23</sup> Na <sup>18</sup> O, <sup>25</sup> Mg <sup>16</sup> O                                                                                                                                     |
| 1 | 52.0  | 55               | <sup>52</sup> Cr                                        | <sup>12</sup> C <sup>40</sup> Ar, <sup>36</sup> Ar <sup>16</sup> O, <sup>38</sup> Ar <sup>14</sup> N, <sup>35</sup> Cl <sup>16</sup> O <sup>1</sup> H, <sup>35</sup> Cl <sup>17</sup> O, ...                                            |
| 1 | 54.0  | 916              | <sup>54</sup> Cr, <sup>54</sup> Fe                      | <sup>40</sup> Ar <sup>14</sup> N, <sup>36</sup> Ar <sup>18</sup> O, <sup>38</sup> Ar <sup>16</sup> O, <sup>42</sup> Ca <sup>12</sup> C, <sup>40</sup> Ca <sup>14</sup> N, <sup>35</sup> Cl <sup>18</sup> O <sup>1</sup> H, ...          |
| 1 | 55.0  | 132              | <sup>55</sup> Mn                                        | <sup>41</sup> K <sup>14</sup> N, <sup>40</sup> Ar <sup>15</sup> N, <sup>36</sup> Ar <sup>16</sup> O <sup>1</sup> H, <sup>38</sup> Ar <sup>17</sup> O, <sup>40</sup> Ar <sup>14</sup> N <sup>1</sup> H, ...                              |
| 1 | 56.0  | 10730            | <sup>56</sup> Fe                                        | <sup>55</sup> Mn <sup>1</sup> H, <sup>40</sup> Ar <sup>16</sup> O, <sup>40</sup> Ar <sup>15</sup> N <sup>1</sup> H, <sup>38</sup> Ar <sup>18</sup> O, <sup>38</sup> Ar <sup>17</sup> O <sup>1</sup> H, ...                              |
| 1 | 57.0  | 417              | <sup>57</sup> Fe                                        | <sup>40</sup> Ar <sup>16</sup> O <sup>1</sup> H, <sup>114</sup> Sn <sup>++</sup> , <sup>45</sup> Sc <sup>12</sup> C, <sup>114</sup> Cd <sup>++</sup> , <sup>38</sup> Ar <sup>18</sup> O <sup>1</sup> H, ...                             |
| 1 | 58.0  | 62               | <sup>58</sup> Fe, <sup>58</sup> Ni                      | <sup>40</sup> Ar <sup>18</sup> O, <sup>40</sup> Ar <sup>17</sup> O <sup>1</sup> H, <sup>57</sup> Fe <sup>1</sup> H, <sup>42</sup> Ca <sup>16</sup> O, <sup>24</sup> Mg <sup>34</sup> S, ...                                             |
| 1 | 62.9  | 215              | <sup>63</sup> Cu                                        | <sup>46</sup> Ca <sup>17</sup> O, <sup>49</sup> Ti <sup>14</sup> N, <sup>48</sup> Ca <sup>15</sup> N, <sup>44</sup> Ca <sup>18</sup> O <sup>1</sup> H, <sup>46</sup> Ca <sup>16</sup> O <sup>1</sup> H, ...                             |
| 1 | 64.0  | 154              | <sup>64</sup> Ni, <sup>64</sup> Zn                      | <sup>46</sup> Ca <sup>18</sup> O, <sup>50</sup> Ti <sup>14</sup> N, <sup>23</sup> Na <sup>23</sup> Na <sup>18</sup> O, <sup>48</sup> Ca <sup>16</sup> O, <sup>63</sup> Cu <sup>1</sup> H, ...                                           |
| 1 | 64.9  | 123              | <sup>65</sup> Cu                                        | <sup>36</sup> Ar <sup>14</sup> N <sup>14</sup> N <sup>1</sup> H, <sup>12</sup> C <sup>16</sup> O <sup>37</sup> Cl, <sup>130</sup> Ba <sup>++</sup> , <sup>48</sup> Ca <sup>17</sup> O, ...                                              |
| 1 | 65.9  | 106              | <sup>66</sup> Zn                                        | <sup>24</sup> Mg <sup>40</sup> Ar <sup>1</sup> H, <sup>48</sup> Ca <sup>18</sup> O <sup>1</sup> H, <sup>33</sup> S <sup>16</sup> O <sup>16</sup> O <sup>1</sup> H, <sup>10</sup> B <sup>16</sup> O <sup>40</sup> Ar, ...                |
| 1 | 68.0  | 74               | <sup>68</sup> Zn                                        | <sup>11</sup> B <sup>40</sup> Ar <sup>17</sup> O, <sup>10</sup> B <sup>40</sup> Ar <sup>18</sup> O, <sup>36</sup> Ar <sup>18</sup> O <sup>18</sup> O, <sup>36</sup> Ar <sup>16</sup> O <sup>16</sup> O, ...                             |
| 1 | 120.9 | 190              | <sup>121</sup> Sb                                       | <sup>104</sup> Ru <sup>17</sup> O, <sup>81</sup> Br <sup>40</sup> Ar, <sup>105</sup> Pd <sup>16</sup> O, <sup>104</sup> Ru <sup>16</sup> O <sup>1</sup> H, <sup>120</sup> Sn <sup>1</sup> H                                             |
| 1 | 122.9 | 145              | <sup>123</sup> Sb, <sup>123</sup> Te                    | <sup>106</sup> Cd <sup>17</sup> O, <sup>107</sup> Ag <sup>16</sup> O, <sup>122</sup> Sn <sup>1</sup> H, <sup>91</sup> Zr <sup>16</sup> O <sup>16</sup> O, <sup>90</sup> Zr <sup>16</sup> O <sup>16</sup> O <sup>1</sup> H               |
| 1 | 137.9 | 327              | <sup>138</sup> Ba, <sup>138</sup> La, <sup>138</sup> Ce | <sup>98</sup> Ru <sup>36</sup> Ar, <sup>100</sup> Mo <sup>38</sup> Ar, <sup>102</sup> Ru <sup>36</sup> Ar, <sup>120</sup> Sn <sup>18</sup> O, <sup>121</sup> Sb <sup>17</sup> O, ...                                                    |
| 2 | 19.0  | 320              | <sup>19</sup> F                                         | H <sub>3</sub> O <sup>+</sup>                                                                                                                                                                                                           |
| 2 | 23.0  | 407              | <sup>23</sup> Na                                        | <sup>46</sup> Ca <sup>++</sup> , <sup>7</sup> Li <sup>16</sup> O, <sup>6</sup> Li <sup>16</sup> O <sup>1</sup> H, <sup>6</sup> Li <sup>17</sup> O, <sup>46</sup> Ti <sup>++</sup>                                                       |
| 2 | 24.0  | 122              | <sup>24</sup> Mg                                        | <sup>12</sup> C <sup>12</sup> C, <sup>48</sup> Ca <sup>++</sup> , <sup>7</sup> Li <sup>16</sup> O <sup>1</sup> H, <sup>7</sup> Li <sup>17</sup> O, <sup>10</sup> B <sup>14</sup> N, <sup>6</sup> Li <sup>18</sup> O, ...                |
| 2 | 29.0  | 814              | <sup>29</sup> Si                                        | <sup>58</sup> Fe <sup>++</sup> , <sup>11</sup> B <sup>18</sup> O, <sup>11</sup> B <sup>17</sup> O <sup>1</sup> H, <sup>10</sup> B <sup>18</sup> O <sup>1</sup> H, <sup>13</sup> C <sup>16</sup> O, <sup>12</sup> C <sup>17</sup> O, ... |
| 2 | 30.0  | 177              | <sup>30</sup> Si                                        | <sup>11</sup> B <sup>18</sup> O <sup>1</sup> H, <sup>12</sup> C <sup>18</sup> O, <sup>13</sup> C <sup>17</sup> O, <sup>13</sup> C <sup>16</sup> O <sup>1</sup> H, <sup>12</sup> C <sup>16</sup> O <sup>1</sup> H <sup>1</sup> H, ...    |
| 2 | 32.0  | 208              | <sup>32</sup> S                                         | <sup>16</sup> O <sup>16</sup> O, <sup>14</sup> N <sup>17</sup> O <sup>1</sup> H, <sup>15</sup> N <sup>17</sup> O, <sup>14</sup> N <sup>18</sup> O                                                                                       |
| 2 | 64.0  | 64               | <sup>64</sup> Ni, <sup>64</sup> Zn                      | <sup>46</sup> Ca <sup>18</sup> O, <sup>50</sup> Ti <sup>14</sup> N, <sup>23</sup> Na <sup>23</sup> Na <sup>18</sup> O, <sup>48</sup> Ca <sup>16</sup> O, <sup>63</sup> Cu <sup>1</sup> H, ...                                           |
| 2 | 101.9 | 178              | <sup>102</sup> Ru, <sup>102</sup> Pd                    | <sup>204</sup> Hg <sup>++</sup> , <sup>52</sup> Cr <sup>16</sup> O <sup>16</sup> O <sup>16</sup> O <sup>1</sup> H <sup>1</sup> H, <sup>53</sup> Cr <sup>16</sup> O <sup>16</sup> O <sup>16</sup> O <sup>1</sup> H, ...                  |
| 2 | 103.9 | 2133             | <sup>104</sup> Ru, <sup>104</sup> Pd                    | <sup>87</sup> Rb <sup>16</sup> O <sup>1</sup> H, <sup>54</sup> Cr <sup>16</sup> O <sup>16</sup> O <sup>16</sup> O <sup>1</sup> H <sup>1</sup> H, <sup>64</sup> Ni <sup>40</sup> Ar, <sup>208</sup> Pb <sup>++</sup> , ...               |
| 2 | 105.9 | 4354             | <sup>106</sup> Pd, <sup>106</sup> Cd                    | <sup>105</sup> Pd <sup>1</sup> H, <sup>88</sup> Sr <sup>18</sup> O, <sup>88</sup> Sr <sup>17</sup> O <sup>1</sup> H, <sup>89</sup> Y <sup>17</sup> O, <sup>89</sup> Y <sup>16</sup> O <sup>1</sup> H, ...                               |
| 2 | 107.9 | 4281             | <sup>108</sup> Pd, <sup>108</sup> Cd                    | <sup>107</sup> Ag <sup>1</sup> H, <sup>52</sup> Cr <sup>40</sup> Ar <sup>16</sup> O, <sup>92</sup> Mo <sup>16</sup> O, <sup>76</sup> Se <sup>16</sup> O <sup>16</sup> O, <sup>89</sup> Y <sup>18</sup> O <sup>1</sup> H, ...            |
| 2 | 109.9 | 2397             | <sup>110</sup> Pd, <sup>110</sup> Cd                    | <sup>54</sup> Cr <sup>40</sup> Ar <sup>16</sup> O, <sup>109</sup> Ag <sup>1</sup> H, <sup>72</sup> Ge <sup>38</sup> Ar, <sup>70</sup> Ge <sup>40</sup> Ar, <sup>74</sup> Ge <sup>36</sup> Ar, ...                                       |
| 3 | 19.0  | 261              | <sup>19</sup> F                                         | H <sub>3</sub> O <sup>+</sup>                                                                                                                                                                                                           |
| 3 | 23.0  | 533              | <sup>23</sup> Na                                        | <sup>46</sup> Ca <sup>++</sup> , <sup>7</sup> Li <sup>16</sup> O, <sup>6</sup> Li <sup>16</sup> O <sup>1</sup> H, <sup>6</sup> Li <sup>17</sup> O, <sup>46</sup> Ti <sup>++</sup>                                                       |
| 3 | 24.0  | 177              | <sup>24</sup> Mg                                        | <sup>12</sup> C <sup>12</sup> C, <sup>48</sup> Ca <sup>++</sup> , <sup>7</sup> Li <sup>16</sup> O <sup>1</sup> H, <sup>7</sup> Li <sup>17</sup> O, <sup>10</sup> B <sup>14</sup> N, <sup>6</sup> Li <sup>18</sup> O, ...                |
| 3 | 27.0  | 840              | <sup>27</sup> Al                                        | <sup>9</sup> Be <sup>17</sup> O <sup>1</sup> H, <sup>9</sup> Be <sup>18</sup> O, <sup>10</sup> B <sup>16</sup> O <sup>1</sup> H, <sup>9</sup> B <sup>18</sup> O, <sup>11</sup> B <sup>16</sup> O, <sup>10</sup> B <sup>17</sup> O, ...  |
| 3 | 28.0  | 6115             | <sup>28</sup> Si                                        | <sup>9</sup> Be <sup>18</sup> O <sup>1</sup> H, <sup>56</sup> Fe <sup>++</sup> , <sup>11</sup> B <sup>17</sup> O, <sup>10</sup> B <sup>18</sup> O, <sup>11</sup> B <sup>16</sup> O <sup>1</sup> H, ...                                  |

|   |       |      |                                                         |                                                                                                                                                                                                                                                                 |
|---|-------|------|---------------------------------------------------------|-----------------------------------------------------------------------------------------------------------------------------------------------------------------------------------------------------------------------------------------------------------------|
| 3 | 29.0  | 876  | <sup>29</sup> Si                                        | <sup>58</sup> Fe <sup>++</sup> , <sup>11</sup> B <sup>18</sup> O, <sup>11</sup> B <sup>17</sup> O <sup>1</sup> H, <sup>10</sup> B <sup>18</sup> O <sup>1</sup> H, <sup>13</sup> C <sup>16</sup> O, <sup>12</sup> C <sup>17</sup> O, ...                         |
| 3 | 30.0  | 321  | <sup>30</sup> Si                                        | <sup>11</sup> B <sup>18</sup> O <sup>1</sup> H, <sup>12</sup> C <sup>18</sup> O, <sup>13</sup> C <sup>17</sup> O, <sup>13</sup> C <sup>16</sup> O <sup>1</sup> H, <sup>12</sup> C <sup>16</sup> O <sup>1</sup> H <sup>1</sup> H, ...                            |
| 3 | 31.0  | 82   | <sup>31</sup> P                                         | <sup>14</sup> N <sup>16</sup> O <sup>1</sup> H, <sup>15</sup> N <sup>15</sup> N <sup>1</sup> H, <sup>13</sup> C <sup>18</sup> O, <sup>12</sup> C <sup>18</sup> O <sup>1</sup> H, <sup>13</sup> C <sup>17</sup> O <sup>1</sup> H, ...                            |
| 3 | 32.0  | 341  | <sup>32</sup> S                                         | <sup>16</sup> O <sup>16</sup> O, <sup>14</sup> N <sup>17</sup> O <sup>1</sup> H, <sup>15</sup> N <sup>17</sup> O, <sup>14</sup> N <sup>18</sup> O                                                                                                               |
| 3 | 64.0  | 73   | <sup>64</sup> Ni, <sup>64</sup> Zn                      | <sup>46</sup> Ca <sup>18</sup> O, <sup>50</sup> Ti <sup>14</sup> N, <sup>23</sup> Na <sup>23</sup> Na <sup>18</sup> O, <sup>48</sup> Ca <sup>16</sup> O, <sup>63</sup> Cu <sup>1</sup> H, ...                                                                   |
| 3 | 65.9  | 65   | <sup>66</sup> Zn                                        | <sup>24</sup> Mg <sup>40</sup> Ar <sup>1</sup> H, <sup>48</sup> Ca <sup>18</sup> O <sup>1</sup> H, <sup>33</sup> S <sup>16</sup> O <sup>16</sup> O <sup>1</sup> H, <sup>10</sup> B <sup>16</sup> O <sup>40</sup> Ar, ...                                        |
| 3 | 137.9 | 58   | <sup>138</sup> Ba, <sup>138</sup> La, <sup>138</sup> Ce | <sup>98</sup> Ru <sup>36</sup> Ar, <sup>100</sup> Mo <sup>38</sup> Ar, <sup>102</sup> Ru <sup>36</sup> Ar, <sup>120</sup> Sn <sup>18</sup> O, <sup>121</sup> Sb <sup>17</sup> O, ...                                                                            |
| 3 | 208.0 | 51   | <sup>208</sup> Pb                                       | <sup>168</sup> Er <sup>40</sup> Ar, <sup>168</sup> Yb <sup>40</sup> Ar, <sup>192</sup> Os <sup>16</sup> O, <sup>207</sup> Pb <sup>1</sup> H, <sup>171</sup> Yb <sup>37</sup> Cl, ...                                                                            |
| 4 | 19.0  | 193  | <sup>19</sup> F                                         | H <sub>3</sub> O <sup>+</sup>                                                                                                                                                                                                                                   |
| 4 | 23.0  | 497  | <sup>23</sup> Na                                        | <sup>46</sup> Ca <sup>++</sup> , <sup>7</sup> Li <sup>16</sup> O, <sup>6</sup> Li <sup>16</sup> O <sup>1</sup> H, <sup>6</sup> Li <sup>17</sup> O, <sup>46</sup> Ti <sup>++</sup>                                                                               |
| 4 | 24.0  | 149  | <sup>24</sup> Mg                                        | <sup>12</sup> C <sup>12</sup> C, <sup>48</sup> Ca <sup>++</sup> , <sup>7</sup> Li <sup>16</sup> O <sup>1</sup> H, <sup>7</sup> Li <sup>17</sup> O, <sup>10</sup> B <sup>14</sup> N, <sup>6</sup> Li <sup>18</sup> O, ...                                        |
| 4 | 27.0  | 76   | <sup>27</sup> Al                                        | <sup>9</sup> Be <sup>17</sup> O <sup>1</sup> H, <sup>9</sup> Be <sup>18</sup> O, <sup>10</sup> B <sup>16</sup> O <sup>1</sup> H, <sup>9</sup> B <sup>18</sup> O, <sup>11</sup> B <sup>16</sup> O, <sup>10</sup> B <sup>17</sup> O, ...                          |
| 4 | 29.0  | 912  | <sup>29</sup> Si                                        | <sup>58</sup> Fe <sup>++</sup> , <sup>11</sup> B <sup>18</sup> O, <sup>11</sup> B <sup>17</sup> O <sup>1</sup> H, <sup>10</sup> B <sup>18</sup> O <sup>1</sup> H, <sup>13</sup> C <sup>16</sup> O, <sup>12</sup> C <sup>17</sup> O, ...                         |
| 4 | 30.0  | 279  | <sup>30</sup> Si                                        | <sup>11</sup> B <sup>18</sup> O <sup>1</sup> H, <sup>12</sup> C <sup>18</sup> O, <sup>13</sup> C <sup>17</sup> O, <sup>13</sup> C <sup>16</sup> O <sup>1</sup> H, <sup>12</sup> C <sup>16</sup> O <sup>1</sup> H <sup>1</sup> H, ...                            |
| 4 | 31.0  | 4798 | <sup>31</sup> P                                         | <sup>14</sup> N <sup>16</sup> O <sup>1</sup> H, <sup>15</sup> N <sup>15</sup> N <sup>1</sup> H, <sup>13</sup> C <sup>18</sup> O, <sup>12</sup> C <sup>18</sup> O <sup>1</sup> H, <sup>13</sup> C <sup>17</sup> O <sup>1</sup> H, ...                            |
| 4 | 32.0  | 1427 | <sup>32</sup> S                                         | <sup>16</sup> O <sup>16</sup> O, <sup>14</sup> N <sup>17</sup> O <sup>1</sup> H, <sup>15</sup> N <sup>17</sup> O, <sup>14</sup> N <sup>18</sup> O                                                                                                               |
| 4 | 34.0  | 102  | <sup>34</sup> S                                         | <sup>15</sup> N <sup>18</sup> O <sup>1</sup> H, <sup>16</sup> O <sup>17</sup> O <sup>1</sup> H, <sup>13</sup> C <sup>18</sup> O <sup>1</sup> H <sup>1</sup> H, <sup>17</sup> O <sup>17</sup> O, <sup>16</sup> O <sup>18</sup> O, <sup>33</sup> S <sup>1</sup> H |
| 4 | 47.0  | 127  | <sup>47</sup> Ti                                        | <sup>30</sup> Si <sup>17</sup> O, <sup>29</sup> Si <sup>18</sup> O, <sup>12</sup> C <sup>35</sup> Cl, <sup>33</sup> S <sup>14</sup> N, <sup>46</sup> Ca <sup>1</sup> H, <sup>7</sup> Li <sup>40</sup> Ar, ...                                                   |
| 4 | 48.0  | 65   | <sup>48</sup> Ca, <sup>48</sup> Ti                      | <sup>30</sup> Si <sup>18</sup> O, <sup>12</sup> C <sup>12</sup> C <sup>12</sup> C <sup>12</sup> C, <sup>12</sup> C <sup>36</sup> Ar, <sup>14</sup> N <sup>16</sup> O <sup>18</sup> O, ...                                                                       |
| 4 | 56.0  | 360  | <sup>56</sup> Fe                                        | <sup>55</sup> Mn <sup>1</sup> H, <sup>40</sup> Ar <sup>16</sup> O, <sup>40</sup> Ar <sup>15</sup> N <sup>1</sup> H, <sup>38</sup> Ar <sup>18</sup> O, <sup>38</sup> Ar <sup>17</sup> O <sup>1</sup> H, ...                                                      |
| 4 | 63.0  | 137  | <sup>63</sup> Cu                                        | <sup>46</sup> Ca <sup>17</sup> O, <sup>49</sup> Ti <sup>14</sup> N, <sup>48</sup> Ca <sup>15</sup> N, <sup>44</sup> Ca <sup>18</sup> O <sup>1</sup> H, <sup>46</sup> Ca <sup>16</sup> O <sup>1</sup> H, ...                                                     |
| 4 | 64.0  | 191  | <sup>64</sup> Ni, <sup>64</sup> Zn                      | <sup>46</sup> Ca <sup>18</sup> O, <sup>50</sup> Ti <sup>14</sup> N, <sup>23</sup> Na <sup>23</sup> Na <sup>18</sup> O, <sup>48</sup> Ca <sup>16</sup> O, <sup>63</sup> Cu <sup>1</sup> H, ...                                                                   |
| 4 | 64.9  | 68   | <sup>65</sup> Cu                                        | <sup>36</sup> Ar <sup>14</sup> N <sup>14</sup> N <sup>1</sup> H, <sup>12</sup> C <sup>16</sup> O <sup>37</sup> Cl, <sup>130</sup> Ba <sup>++</sup> , <sup>48</sup> Ca <sup>17</sup> O, ...                                                                      |
| 4 | 65.9  | 127  | <sup>66</sup> Zn                                        | <sup>24</sup> Mg <sup>40</sup> Ar <sup>1</sup> H, <sup>48</sup> Ca <sup>18</sup> O <sup>1</sup> H, <sup>33</sup> S <sup>16</sup> O <sup>16</sup> O <sup>1</sup> H, <sup>10</sup> B <sup>16</sup> O <sup>40</sup> Ar, ...                                        |
| 4 | 67.9  | 70   | <sup>68</sup> Zn                                        | <sup>11</sup> B <sup>40</sup> Ar <sup>17</sup> O, <sup>10</sup> B <sup>40</sup> Ar <sup>18</sup> O, <sup>36</sup> Ar <sup>18</sup> O <sup>18</sup> O, <sup>36</sup> Ar <sup>16</sup> O <sup>16</sup> O, ...                                                     |
| 4 | 103.9 | 219  | <sup>104</sup> Ru, <sup>104</sup> Pd                    | <sup>87</sup> Rb <sup>16</sup> O <sup>1</sup> H, <sup>54</sup> Cr <sup>16</sup> O <sup>16</sup> O <sup>16</sup> O <sup>1</sup> H <sup>1</sup> H, <sup>64</sup> Ni <sup>40</sup> Ar, <sup>208</sup> Pb <sup>++</sup> , ...                                       |
| 4 | 105.9 | 577  | <sup>106</sup> Pd, <sup>106</sup> Cd                    | <sup>105</sup> Pd <sup>1</sup> H, <sup>88</sup> Sr <sup>18</sup> O, <sup>88</sup> Sr <sup>17</sup> O <sup>1</sup> H, <sup>89</sup> Y <sup>17</sup> O, <sup>89</sup> Y <sup>16</sup> O <sup>1</sup> H, ...                                                       |
| 4 | 107.9 | 581  | <sup>108</sup> Pd, <sup>108</sup> Cd                    | <sup>107</sup> Ag <sup>1</sup> H, <sup>52</sup> Cr <sup>40</sup> Ar <sup>16</sup> O, <sup>92</sup> Mo <sup>16</sup> O, <sup>76</sup> Se <sup>16</sup> O <sup>16</sup> O, <sup>89</sup> Y <sup>18</sup> O <sup>1</sup> H, ...                                    |
| 4 | 109.9 | 252  | <sup>110</sup> Pd, <sup>110</sup> Cd                    | <sup>54</sup> Cr <sup>40</sup> Ar <sup>16</sup> O, <sup>109</sup> Ag <sup>1</sup> H, <sup>72</sup> Ge <sup>38</sup> Ar, <sup>70</sup> Ge <sup>40</sup> Ar, <sup>74</sup> Ge <sup>36</sup> Ar, ...                                                               |

<sup>a</sup> All interferences are positively charged ions unless otherwise noted.
